# Supplementary material
Source: PubMed Central journal article supplement (PMC5137838)
Supplement: BCP-82-1134-s001.pdf [file BCP-82-1134-s001.pdf]

Supplementary Table 1: Multivariable analysis of initiation on each antihypertensive class as compared to all other classes

|                                                              | ACE inhibitors          |                  | ARBs                    |         | Thiazide diuretics      |                  | Beta-blockers           |                  | Calcium channel blockers |                  |
|--------------------------------------------------------------|-------------------------|------------------|-------------------------|---------|-------------------------|------------------|-------------------------|------------------|--------------------------|------------------|
|                                                              | OR (95% CI)             | p-value          | OR (95% CI)             | p-value | OR (95% CI)             | p-value          | OR (95% CI)             | p-value          | OR (95% CI)              | p-value          |
| <b>Year of initiation</b>                                    |                         |                  |                         |         |                         |                  |                         |                  |                          |                  |
| 2008/09                                                      | 1.00 (0.94-1.06)        | <0.001           | 1.01 (0.95-1.08)        | <0.001  | 1.87 (1.67-2.10)        | <0.001           | 0.82 (0.75-0.88)        | <0.001           | 0.85 (0.78-0.92)         | <0.001           |
| 2009/10                                                      | 0.90 (0.84-0.95)        |                  | 1.10 (1.03-1.18)        |         | 1.70 (1.52-1.91)        |                  | 0.87 (0.80-0.95)        |                  | 0.88 (0.81-0.96)         |                  |
| 2010/11                                                      | 0.90 (0.85-0.96)        |                  | 1.12 (1.05-1.19)        |         | 1.36 (1.21-1.54)        |                  | 0.95 (0.88-1.03)        |                  | 0.87 (0.80-0.95)         |                  |
| 2011/12                                                      | 0.88 (0.83-0.94)        |                  | 1.17 (1.10-1.25)        |         | 1.15 (1.01-1.30)        |                  | 0.86 (0.79-0.94)        |                  | 1.04 (0.96-1.13)         |                  |
| 2012/13                                                      | 0.96 (0.90-1.02)        |                  | 0.99 (0.92-1.06)        |         | 0.97 (0.85-1.10)        |                  | 1.07 (0.99-1.16)        |                  | 1.00 (0.92-1.09)         |                  |
| 2013/14                                                      | 1.00 (Ref)              |                  | 1.00 (Ref)              |         | 1.00 (Ref)              |                  | 1.00 (Ref)              |                  | 1.00 (Ref)               |                  |
| <b>Age</b>                                                   |                         |                  |                         |         |                         |                  |                         |                  |                          |                  |
| 18-49 years                                                  | 0.80 (0.76-0.84)        | <0.001           | 0.76 (0.72-0.81)        | <0.001  | 1.41 (1.28-1.55)        | <0.001           | 1.62 (1.50-1.73)        | <0.001           | 1.19 (1.11-1.29)         | <0.001           |
| 50-59 years                                                  | 1.01 (0.95-1.07)        |                  | 1.02 (0.96-1.08)        |         | 1.03 (0.93-1.16)        |                  | 0.98 (0.90-1.07)        |                  | 0.97 (0.89-1.05)         |                  |
| 60-69 years                                                  | 1.00 (Ref)              |                  | 1.00 (Ref)              |         | 1.00 (Ref)              |                  | 1.00 (Ref)              |                  | 1.00 (Ref)               |                  |
| 70-79 years                                                  | 1.04 (0.99-1.09)        |                  | 0.84 (0.80-0.88)        |         | 1.09 (0.99-1.19)        |                  | 1.12 (1.05-1.20)        |                  | 1.06 (0.99-1.13)         |                  |
| 80+ years                                                    | 1.15 (1.09-1.22)        |                  | 0.64 (0.60-0.68)        |         | 1.04 (0.93-1.17)        |                  | 1.36 (1.26-1.47)        |                  | 1.08 (1.00-1.18)         |                  |
| <b>Female sex</b>                                            | 0.80 (0.77-0.83)        | <0.001           | 1.05 (1.01-1.10)        | 0.008   | 1.81 (1.69-1.94)        | <0.001           | 0.98 (0.94-1.03)        | 0.47             | 1.07 (1.02-1.13)         | 0.006            |
| <b>Number of medicines dispensed in year prior</b>           |                         |                  |                         |         |                         |                  |                         |                  |                          |                  |
| Quartile 1 (1-2)                                             | 1.00 (Ref)              | <0.001           | 1.00 (Ref)              | <0.001  | 1.00 (Ref)              | <0.001           | 1.00 (Ref)              | <0.001           | 1.00 (Ref)               | <0.001           |
| Quartile 2 (3-4)                                             | 0.95 (0.90-1.00)        |                  | 0.95 (0.90-1.01)        |         | 1.08 (0.98-1.19)        |                  | 1.14 (1.06-1.22)        |                  | 0.99 (0.93-1.07)         |                  |
| Quartile 3 (5-7)                                             | 0.89 (0.84-0.94)        |                  | 0.91 (0.86-0.96)        |         | 1.27 (1.15-1.41)        |                  | 1.24 (1.16-1.33)        |                  | 1.01 (0.93-1.08)         |                  |
| Quartile 4 (≥8)                                              | 0.75 (0.71-0.80)        |                  | 0.87 (0.81-0.93)        |         | 1.50 (1.34-1.68)        |                  | 1.38 (1.27-1.50)        |                  | 1.20 (1.11-1.31)         |                  |
| <b>Dispensed medicines for management of:*</b>               |                         |                  |                         |         |                         |                  |                         |                  |                          |                  |
| Angina                                                       | <b>1.00 (0.91-1.10)</b> | <b>0.93</b>      | 0.36 (0.31-0.42)        | <0.001  | 0.38 (0.29-0.50)        | <0.001           | <b>2.54 (2.29-2.82)</b> | <b>&lt;0.001</b> | <b>1.21 (1.06-1.37)</b>  | <b>0.004</b>     |
| Depression                                                   | <b>1.06 (1.01-1.10)</b> | <b>0.02</b>      | <b>0.92 (0.88-0.97)</b> |         | 0.97 (0.89-1.05)        | 0.40             | <i>1.06 (1.00-1.12)</i> | <i>0.05</i>      | 0.98 (0.92-1.04)         | 0.55             |
| Diabetes                                                     | <b>2.15 (2.02-2.28)</b> | <b>&lt;0.001</b> | <b>0.90 (0.84-0.96)</b> |         | <i>0.54 (0.48-0.62)</i> | <i>&lt;0.001</i> | <i>0.47 (0.43-0.52)</i> | <i>&lt;0.001</i> | 0.65 (0.59-0.72)         | <0.001           |
| Gastro-oesophageal reflux disease                            | 1.01 (0.96-1.05)        | 0.83             | 0.97 (0.93-1.02)        |         | 0.98 (0.91-1.06)        | 0.58             | 1.03 (0.97-1.08)        |                  | 1.02 (0.97-1.08)         | 0.44             |
| Gout                                                         | 1.00 (0.91-1.11)        | 0.93             | <b>1.21 (1.09-1.34)</b> |         | <i>0.83 (0.68-1.02)</i> | <i>0.07</i>      | 0.90 (0.79-1.03)        | 0.37             | 0.88 (0.77-1.02)         | 0.08             |
| Heart failure                                                | <b>1.37 (1.27-1.47)</b> | <b>&lt;0.001</b> | <b>0.61 (0.56-0.67)</b> |         | <b>1.17 (1.03-1.33)</b> | <b>0.02</b>      | <b>1.19 (1.09-1.31)</b> | <b>&lt;0.001</b> | <i>0.79 (0.71-0.88)</i>  | <i>&lt;0.001</i> |
| Hyperlipidaemia                                              | 1.13 (1.08-1.17)        | <0.001           | 1.00 (0.95-1.04)        |         | 0.81 (0.75-0.88)        | <0.001           | 1.00 (0.95-1.06)        | 0.90             | 0.89 (0.84-0.95)         | <0.001           |
| Obstructive airway disease                                   | 1.04 (1.00-1.09)        | 0.08             | 1.04 (0.99-1.10)        |         | 1.08 (0.99-1.18)        | 0.07             | <i>0.67 (0.62-0.71)</i> | <i>&lt;0.001</i> | 1.24 (1.17-1.33)         | <0.001           |
| <b>Initiation on fixed dose antihypertensive combination</b> |                         |                  |                         |         |                         |                  |                         |                  |                          |                  |
|                                                              | 0.93 (0.86-1.01)        | 0.07             | 14.48 (4.13-4.85)       |         | 52.06 (47.25-57.35)     | <0.001           | --                      | --               | 2.89 (2.65-3.15)         | <0.001           |
| <b>Initiation on multiple medicines</b>                      |                         |                  |                         |         |                         |                  |                         |                  |                          |                  |
|                                                              | 3.40 (3.12-3.72)        | <0.001           | 1.12 (1.02-1.22)        |         | 4.52 (4.06-5.04)        | <0.001           | 7.59 (6.96-8.27)        | <0.001           | 5.76 (5.29-6.28)         | <0.001           |

\*Reference category for each condition is those with no evidence of dispensed medicines for each health condition

**Bold** represents first-line therapy classified as “potentially beneficial” in the guidelines. *Italic* represents first-line therapy classified as “potentially harmful” in the guidelines.
